# Supplementary material for: Design and evaluation of a thiazoline-appended imidazole based fluorescent turn on chemosensor for Hg2+ ion detection: spectroscopic characterization and solid state film applications
Source: Royal Society of Chemistry journal article supplement (doi:10.1039/d6ra03004a), 2026-06-01
Supplement: d6ra03004a3.pdf [file d6ra03004a3.pdf]

## Supporting Information

### Design and Evaluation of a Thiazoline-Appended Imidazole based Fluorescent Turn ON Chemosensor for Hg<sup>2+</sup> ion Detection: Spectroscopic Characterization and Solid State Film Applications

Bharathkumar Thangaraj<sup>a</sup> Suresh Ranganathan,<sup>b,c</sup> Ravichandran Cingaram,<sup>a</sup> Lakshmipriya Kannan,<sup>a</sup> Sathiyarayanan Kulathu Iyer,<sup>d</sup> Karthikeyan Natesan Sundaramurthy,<sup>a\*</sup>

<sup>a</sup> Department of Chemistry, Easwari Engineering College, India

<sup>b</sup> Department of Chemistry, Karpagam Academy of Higher Education, India.

<sup>c</sup> Centre for Material Chemistry, Karpagam Academy of Higher Education, India.

<sup>d</sup> Chemistry Division, School of Advanced Sciences, Vellore Institute of Technology (VIT), India.

## Table of Contents

|                                                                                        |             |
|----------------------------------------------------------------------------------------|-------------|
| Fig.S1. and Fig. S2 are NMR details of <b>2TA</b> .....                                | Page No: 02 |
| Fig.S3. and Fig. S4 are NMR details of probe <b>BTA</b> .....                          | Page No: 03 |
| Fig.S5. and Fig. S6 are FT-IR and HR-MS spectra of probe <b>BTA</b> .....              | Page No: 04 |
| Fig S7. UV-vis and fluorescence spectra of BTA towards anions.....                     | Page No: 05 |
| Fig S8. Photographs of fluorescence enhancement of BTA-Hg <sup>2+</sup> solution.....  | Page No: 05 |
| Fig. S9. Anti-interference study of <b>BTA</b> towards other ions.....                 | Page No: 06 |
| Fig. S10. Job's plot for <b>BTA</b> Vs Hg <sup>2+</sup> .....                          | Page No: 06 |
| Fig. S11. HR-MS spectrum of <b>BTA</b> -Hg <sup>2+</sup> complex .....                 | Page No: 07 |
| Fig. S12. Nonlinear least-square fitting plot of <b>BTA</b> and Hg <sup>2+</sup> ..... | Page No: 07 |

Fig. S13. FT-IR spectrum of probe **BTA** and **BTA-Hg<sup>2+</sup>** ..... Page No: 08

Fig. S14. pH studies of **BTA** and **BTA-Hg<sup>2+</sup>** ..... Page No: 08

Fig S15. Emission and life time spectra of **BTA/PVA** towards increasing Hg<sup>2+</sup>.....Page No: 08

Table S1. Comparison of Hg<sup>2+</sup> sensing performance with reported probes..... Page No: 10

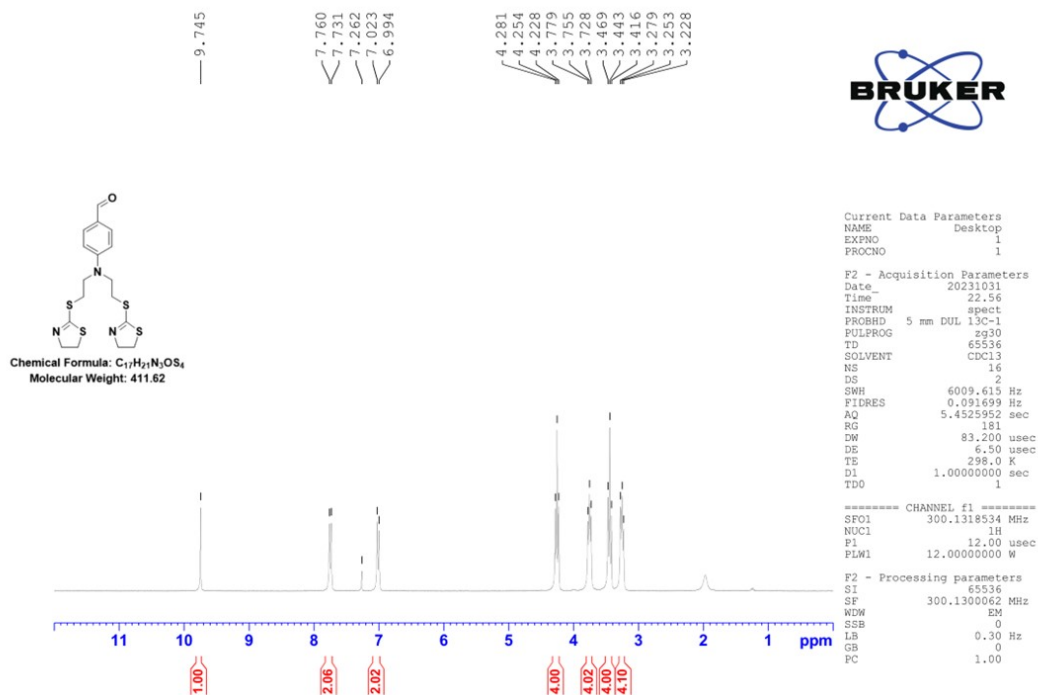

Figure S1. <sup>1</sup>H NMR spectra of **2TA** in CDCl<sub>3</sub>

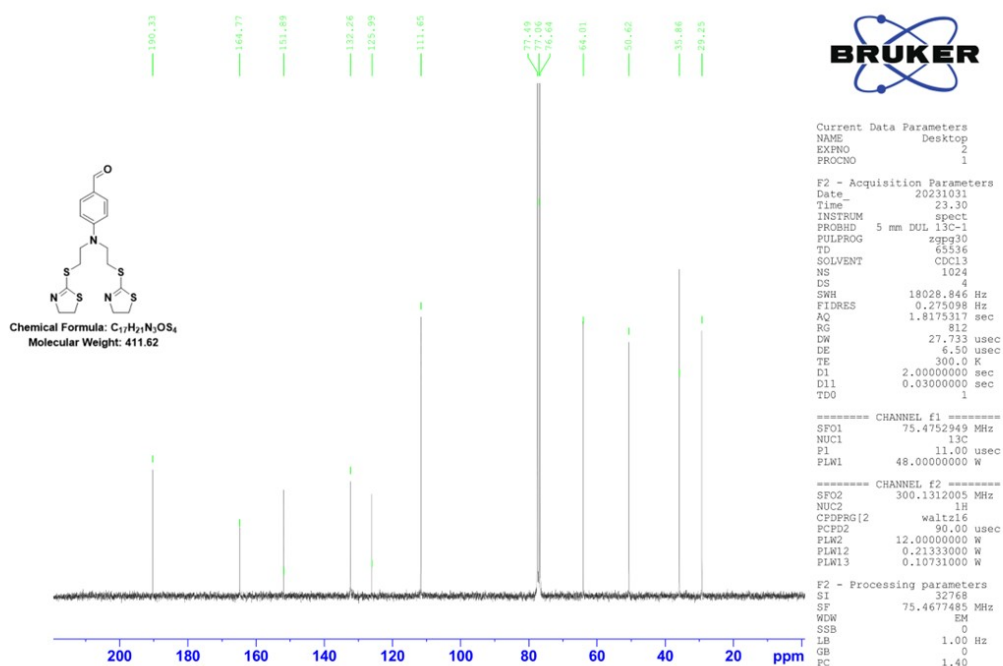

Figure S2.  $^{13}\text{C}$  NMR spectra of 2TA in  $\text{CDCl}_3$

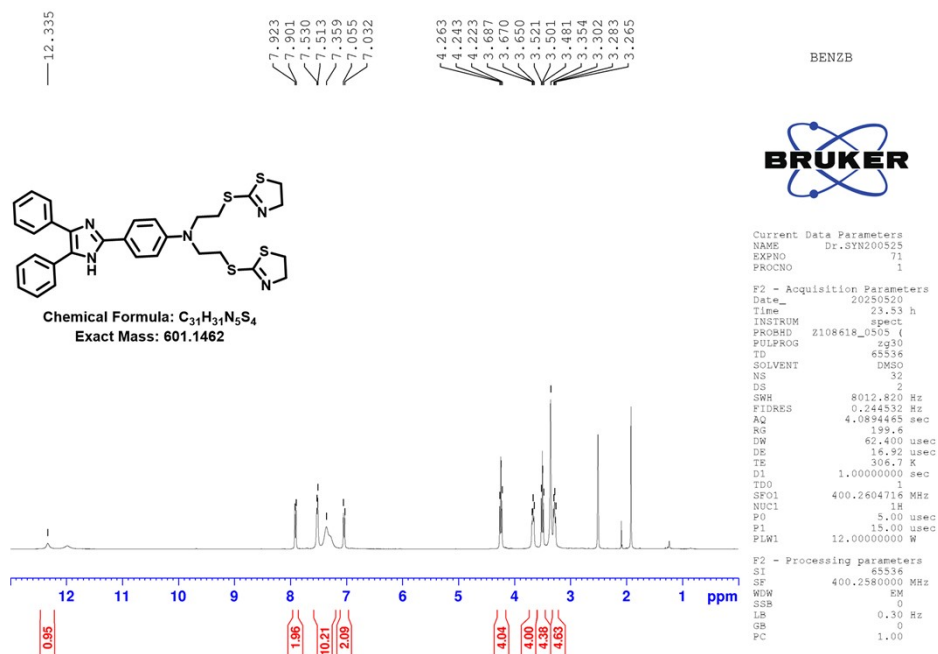

Figure S3.  $^1\text{H}$  NMR spectra of probe BTA in  $\text{DMSO-d}_6$

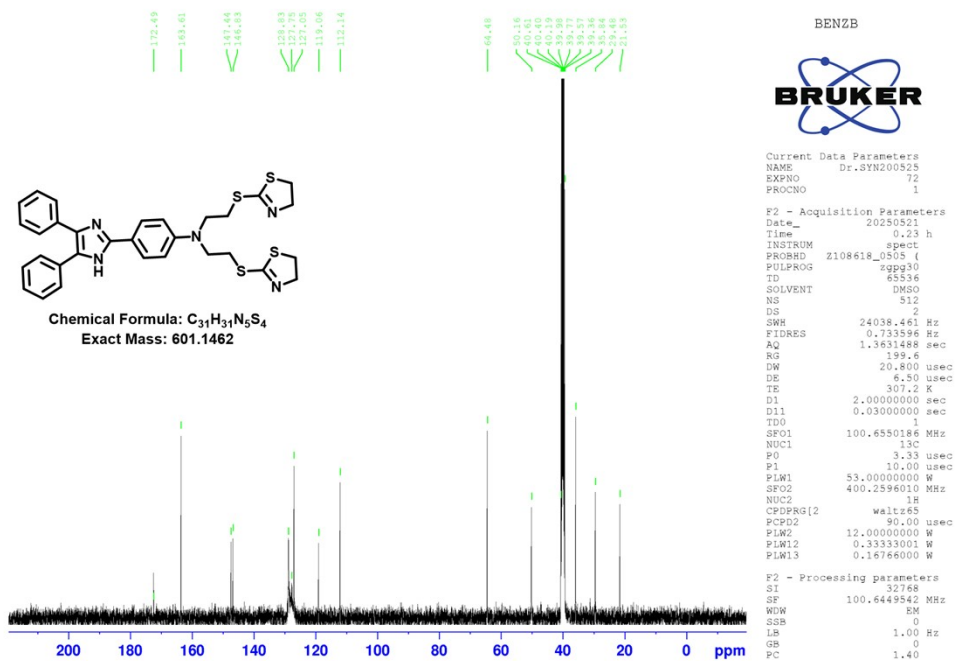

Figure  
NMR  
of

S4.  $^{13}\text{C}$   
spectra  
probe

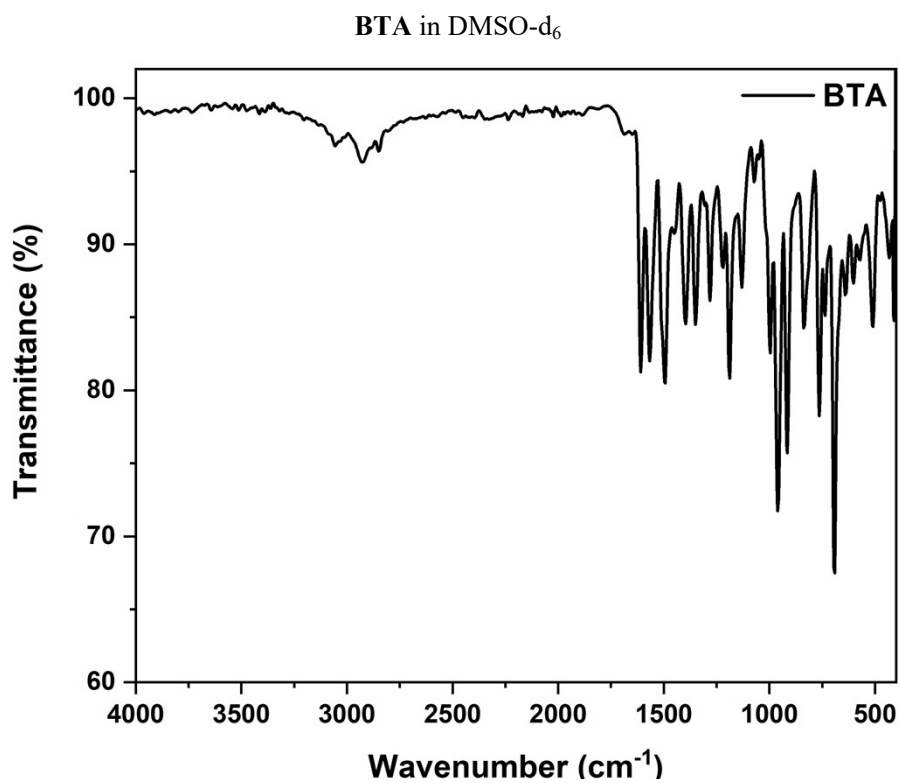

Figure S5. FT-IR spectra of probe BTA

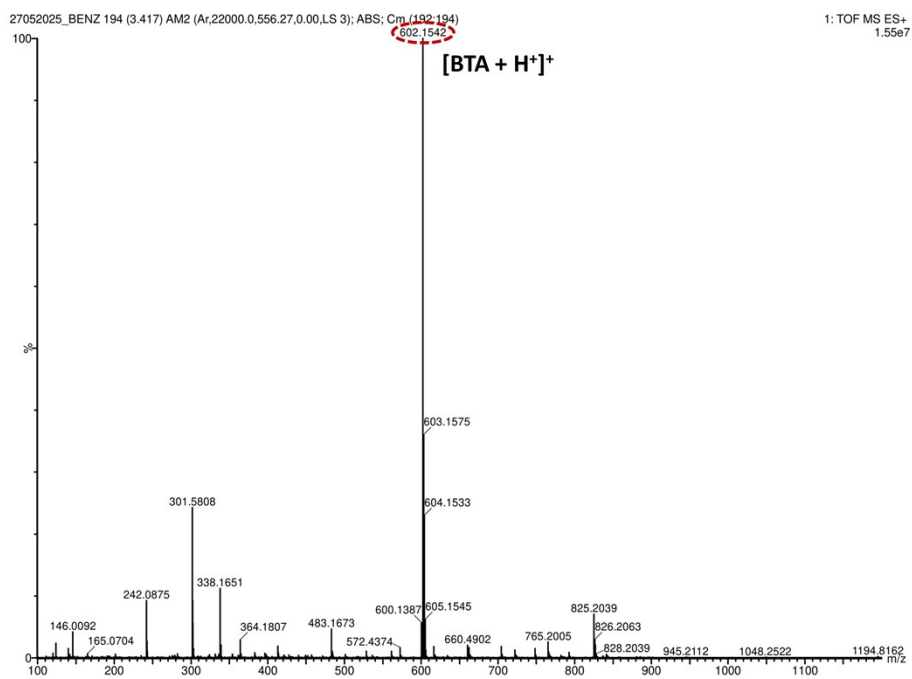

Figure S6. HR-MS spectrum of probe BTA.

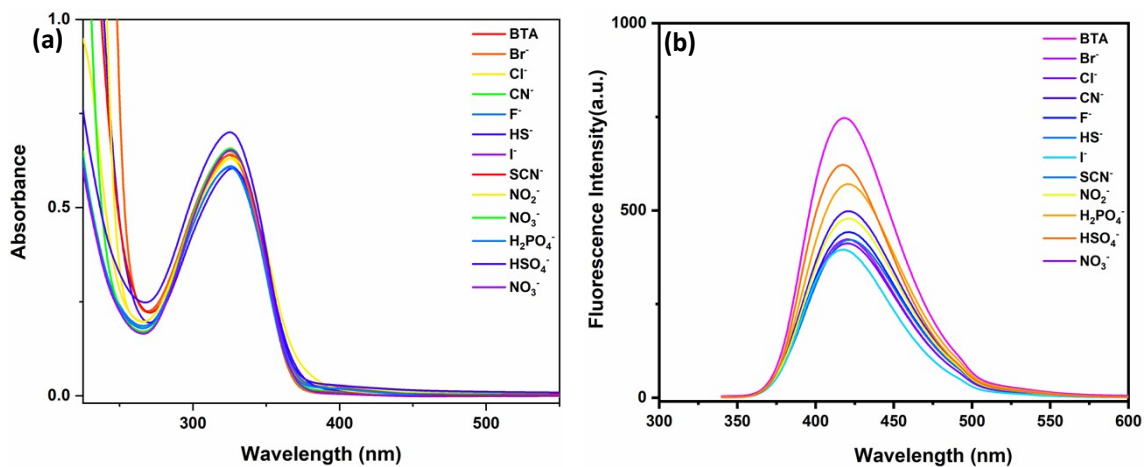

**Figure S7.** (a) UV-vis absorption and (b) fluorescence spectra of probe **BTA** (20 μM) in (CH<sub>3</sub>CN: H<sub>2</sub>O) (6:4, v/v) solution in response to 1 mM of diverse anions (5 equiv.).

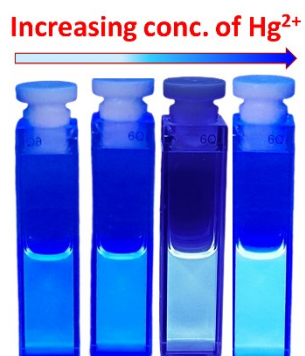

**Figure S8.** Photographs displaying fluorescence enhancement upon increasing concentration of analyte to **BTA** solution.

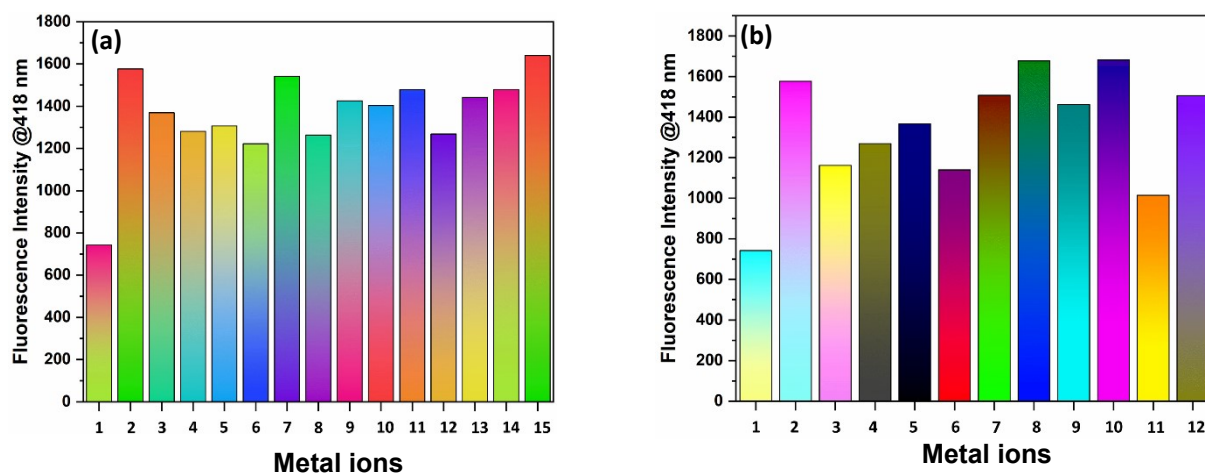

**Figure S9.** Fluorescence response of **BTA** in a mixture of ( $\text{CH}_3\text{CN}:\text{H}_2\text{O}$ ) (6:4, vv) to **(a)** coexisting ions: (1) BTA; (2) BTA- $\text{Hg}^{2+}$ ; (3) BTA- $\text{Hg}^{2+} + \text{Cu}^{2+}, \text{Fe}^{3+}$ ; (4) BTA- $\text{Hg}^{2+} + \text{Na}^+, \text{Fe}^{2+}$ ; (5) BTA- $\text{Hg}^{2+} + \text{Ca}^{2+}, \text{Cu}^{2+}$ ; (6) BTA- $\text{Hg}^{2+} + \text{K}^+, \text{Zn}^{2+}$ ; (7) BTA- $\text{Hg}^{2+} + \text{Ni}^{2+}, \text{Cr}^{3+}$ ; (8) BTA- $\text{Hg}^{2+} + \text{Cr}^{6+}, \text{Zn}^{2+}$ ; (9) BTA- $\text{Hg}^{2+} + \text{Co}^{3+}, \text{Ba}^{2+}$ ; (10) BTA- $\text{Hg}^{2+} + \text{Zn}^{2+}, \text{Cu}^{2+}$ ; (11) BTA- $\text{Hg}^{2+} + \text{Pb}^{2+}, \text{Mg}^{2+}$ ; (12) BTA- $\text{Hg}^{2+} + \text{K}^+, \text{Mg}^{2+}$ ; (13) BTA- $\text{Hg}^{2+} + \text{Cd}^{2+}, \text{Zn}^{2+}$ ; (14) BTA- $\text{Hg}^{2+} + \text{Li}^+, \text{Al}^{3+}$ ; (15) BTA- $\text{Hg}^{2+} + \text{Mg}^{2+}, \text{Mn}^{2+}$ . **(b)** mixed ions (1) BTA; (2) BTA- $\text{Hg}^{2+}$ ; (3) BTA- $\text{Hg}^{2+} + \text{Ni}^{2+}, \text{Cl}^-$ ; (4) BTA- $\text{Hg}^{2+} + \text{Ba}^{2+}, \text{H}_2\text{PO}_4^-$ ; (5) BTA- $\text{Hg}^{2+} + \text{Ca}^{2+}, \text{Br}^-$ ; (6) BTA- $\text{Hg}^{2+} + \text{Pb}^{2+}, \text{CN}^-$ ; (7) BTA- $\text{Hg}^{2+} + \text{Cr}^{3+}, \text{NO}_3^-$ ; (8) BTA- $\text{Hg}^{2+} + \text{Cu}^{2+}, \text{HSO}_4^-$ ; (9) BTA- $\text{Hg}^{2+} + \text{Zn}^{2+}, \text{I}^-$ ; (10) BTA- $\text{Hg}^{2+} + \text{Cd}^{2+}, \text{F}^-$ ; (11) BTA- $\text{Hg}^{2+} + \text{Li}^+, \text{HS}^-$ ; (12) BTA- $\text{Hg}^{2+} + \text{Mg}^{2+}, \text{SCN}^-$ .

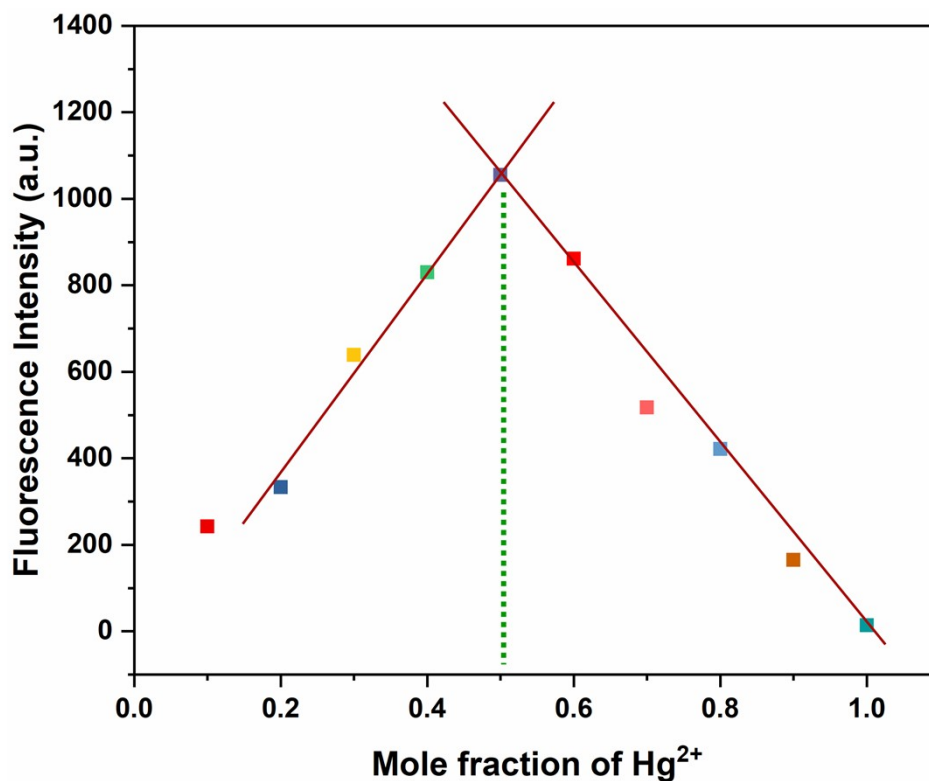

**Figure S10.** Job's plot for probe **BTA** Vs  $\text{Hg}^{2+}$

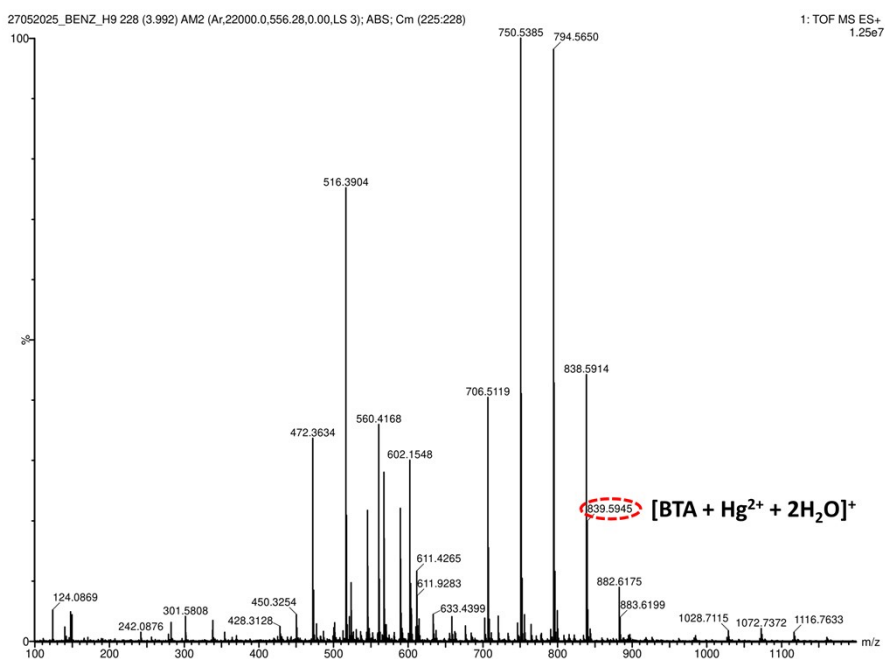

**Figure S11.** HRMS spectra of  $\text{BTA-Hg}^{2+}$  complex.

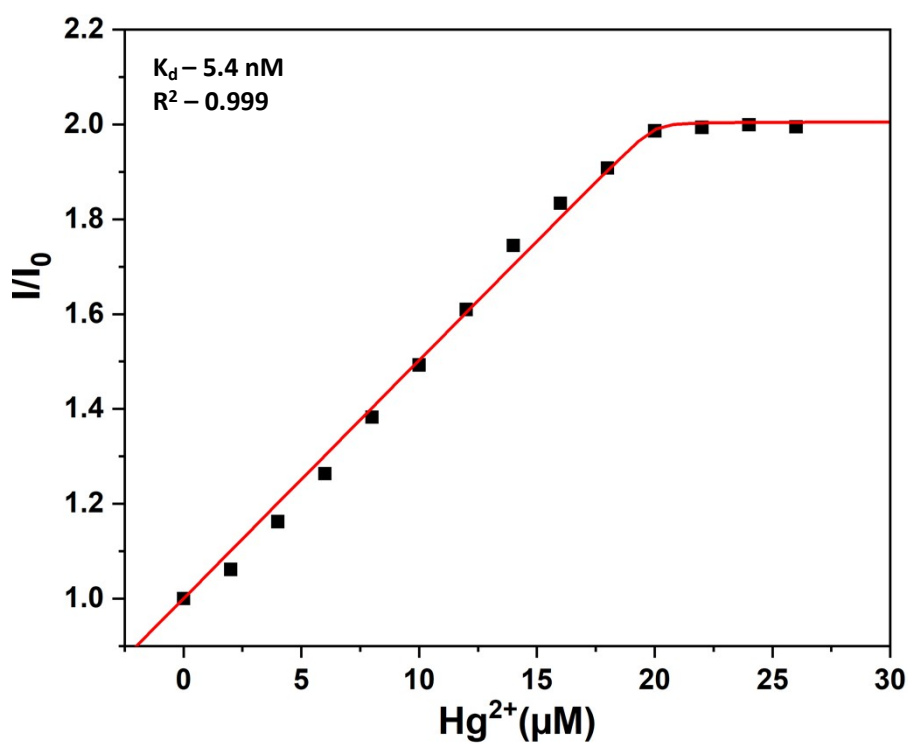

**Figure S12.** Nonlinear least-square fitting of the fluorescent emission intensity changes of **BTA** vs concentration of  $\text{Hg}^{2+}$  in aqueous acetonitrile medium using 1:1 complex binding equation.

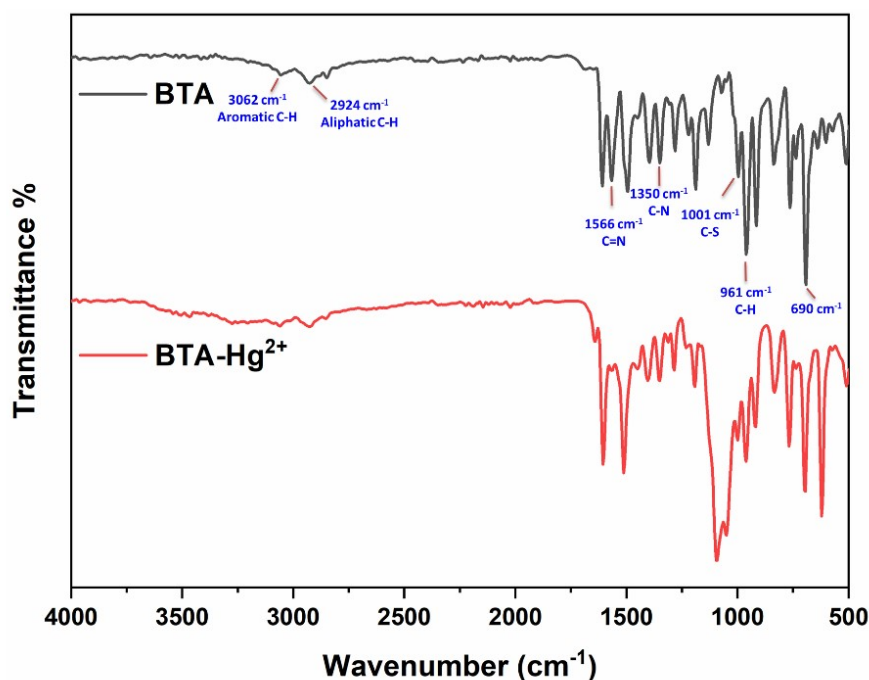

Figure S13. FT-IR spectra of BTA and BTA-Hg<sup>2+</sup> complex.

### S1. pH Studies

To assess the physiological application, the pH dependence of the chemoprobe BTA in CH<sub>3</sub>CN/H<sub>2</sub>O (6:4, v/v) was examined using fluorescence spectroscopy. As shown in Fig. S13, under acidic conditions (pH 2-4), the probe (BTA) and metal complex (BTA-Hg<sup>2+</sup>) shows high fluorescence due to protonation of the imidazole group. As pH increases above 4, fluorescence intensity of BTA decreases sharply and attains its normal state, in contrast, the BTA-Hg<sup>2+</sup> system maintains strong fluorescence over pH 4-10, indicating stable complex formation. At higher pH (11-12), a slight decrease in fluorescence is observed, likely due to increased basicity. Overall, the probe performs optimally in the pH range 4-10, making it suitable for

Hg<sup>2+</sup> detection under environmental conditions.

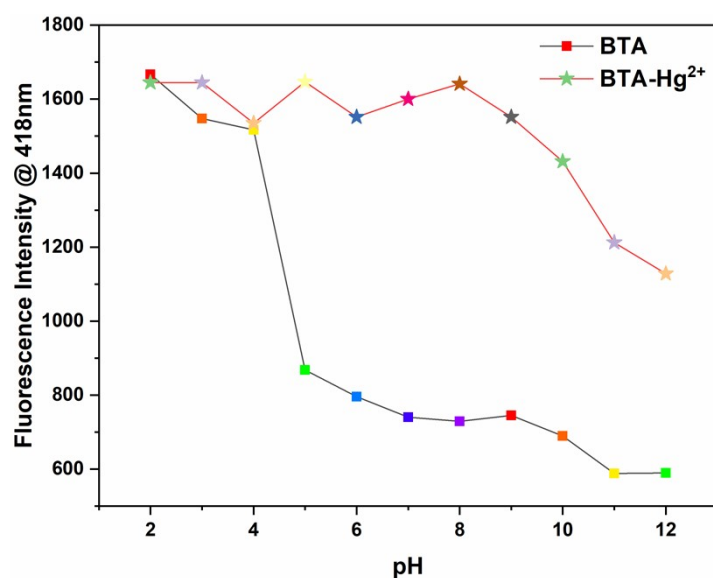

under and biological conditions.

**Figure S14.** Effects of pH on the emission intensity of probe **BTA** (20  $\mu\text{M}$ ) in the absence and presence of  $\text{Hg}^{2+}$  in  $\text{CH}_3\text{CN}/\text{H}_2\text{O}$  (6:4, v/v).

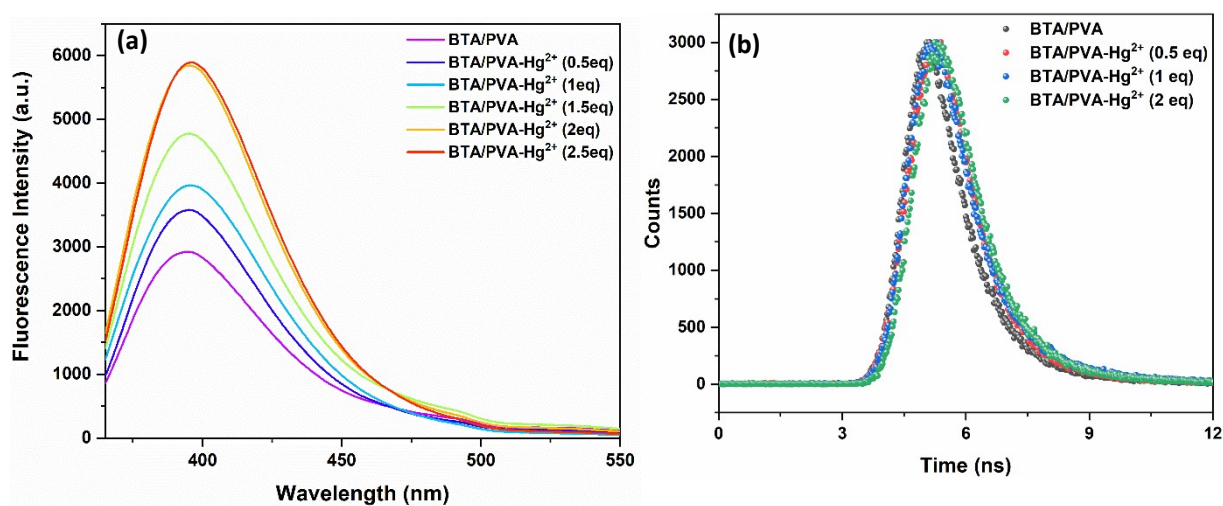

**Figure S15.** (a) Fluorescence response (b) life time spectra of BTA/PVA towards increasing concentration of  $\text{Hg}^{2+}$ .

**Table S1.** Comparison of  $\text{Hg}^{2+}$  sensing performance with reported probes

| Ref No | Chemoprobe                | Detection limit | Detection method       | Interference studies | Reversible studies | Response time | Solid state detection of Hg <sup>2+</sup> |
|--------|---------------------------|-----------------|------------------------|----------------------|--------------------|---------------|-------------------------------------------|
| 1      | Rhodamine Phenolphthalein | 334 nM          | Fluorescence ON        | Done                 | Done               | 12 mins       | Filter paper                              |
| 2      | Dansyl                    | 509 nM          | Fluorescence OFF       | -                    | Done               | -             | -                                         |
| 8      | Thiourea                  | 0.5 μM          | Fluorescence ON        | -                    | -                  | -             | -                                         |
| 4      | Piperazine benzimidazole  | 0.68 μM         | Fluorescence OFF       | Done                 | Done               | -             | -                                         |
| 5      | Thiourea                  | 4.92 μM         | Fluorescence ON        | Done                 | -                  | -             | -                                         |
| 6      | Chitosan-BODIPY           | 1.51 μM         | Fluorescence OFF       | Done                 | -                  | -             | -                                         |
| 7      | BODIPY                    | 0.05 μM         | Fluorescence OFF       | Done                 | -                  | -             | -                                         |
| 8      | Coumarin                  | 3.78 μM         | Colorimetric           | Done                 | Done               | -             | -                                         |
| 9      | Dihydropyrimidine         | 0.5 μM          | Quenching              | -                    | -                  | -             | -                                         |
|        | <b>BTA (This work)</b>    | <b>114 nM</b>   | <b>Fluorescence ON</b> | <b>Done</b>          | <b>Done</b>        | <b>4 sec</b>  | <b>PVA film</b>                           |

## Reference

- 1 A.S. Hussein, F. Lafzi, S. Bayindir, H. Kilic and M. Toprak, *ChemPlusChem*, 2024, **89**, e202300649.
- 2 I. Lourenço, F. Duarte, G.M. Dobrikov, A. Kurutos, I. Slavchev, J.L. Capelo-Martínez, H.M. Santos and C. Lodeiro, *J. Mater. Chem. C*, 2025, **13**, 6708-6719.
- 3 P. Mohanty, P.P. Dash, S. Naik, R. Behura, M. Mishra, H. Sahoo, S.K. Sahoo, A.K. Barick and B.R. Jali, *J. Photochem. Photobiol. A*, 2023, **437**, 114491.
- 4 L. Wang, C. Lou, S. Duan, D. Cheng, A. Wang, B. Zhao, H. Zhao, G. Yin and M. Zhao, *Inorg. Chem. Commun.*, 2020, **119**, 108096.
- 5 H. Kim, M. Lee, J.J. Lee, E.K. Min, K.T. Kim and C. Kim, *J. Photochem. Photobiol. A*, 2022, **428**, 113882.
- 6 D. Wang, L. Marin and X. Cheng, *Int. J. Biol. Macromol.*, 2022, **198**, 194-203.
- 7 C. Chan, H. Liu and Z. Xue, *Microchem. J.*, 2021, **166**, 106247.
- 8 S. Schoeman, N. Mama and L. Myburgh, *New J. Chem.*, 2025, **49**, 1745-1754.
- 9 S. Saha, J. De, R. Choudhury, S.J. Chaudhuri, H. Banik, S.A. Hussain and T.K. Misra, *Inorg. Chim. Acta*, 2025, **577**, 122480.
